# Supplementary material for: The zebrafish progranulin gene family and antisense transcripts
Source: PubMed Central journal article supplement (PMC1310530; doi:10.1186/1471-2164-6-156), 2005-11-08
Supplement: 1471-2164-6-156-S1.pdf [file 1471-2164-6-156-S1.pdf]

**A**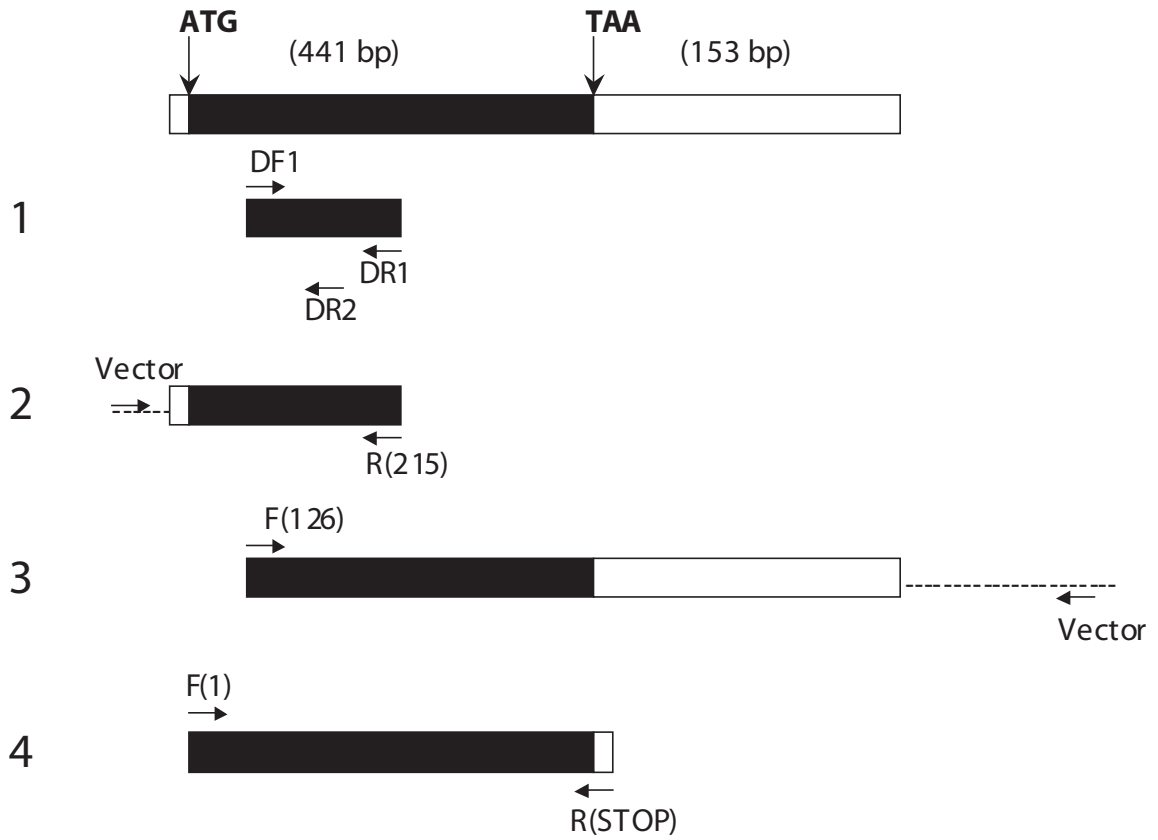**B**

```

1  MFPVLMLLMAALVAADEPLLDLSIPVETVDTSAS 34
35  VIHCDAQTVCCPDGTTCCLSPYGIWSCCPYSMGQCCRDGIHCCQHGYRCDSTSTRCLR 91
92  GWLTLPS SFQKATRTFQKDQTHAE 115
116 TVQCEGNFYCPAEKFCCKTRTGQWGCCSGLEL* 147

```
