# Supplementary material for: The zebrafish progranulin gene family and antisense transcripts
Source: PubMed Central journal article supplement (PMC1310530; doi:10.1186/1471-2164-6-156), 2005-11-08

**A**

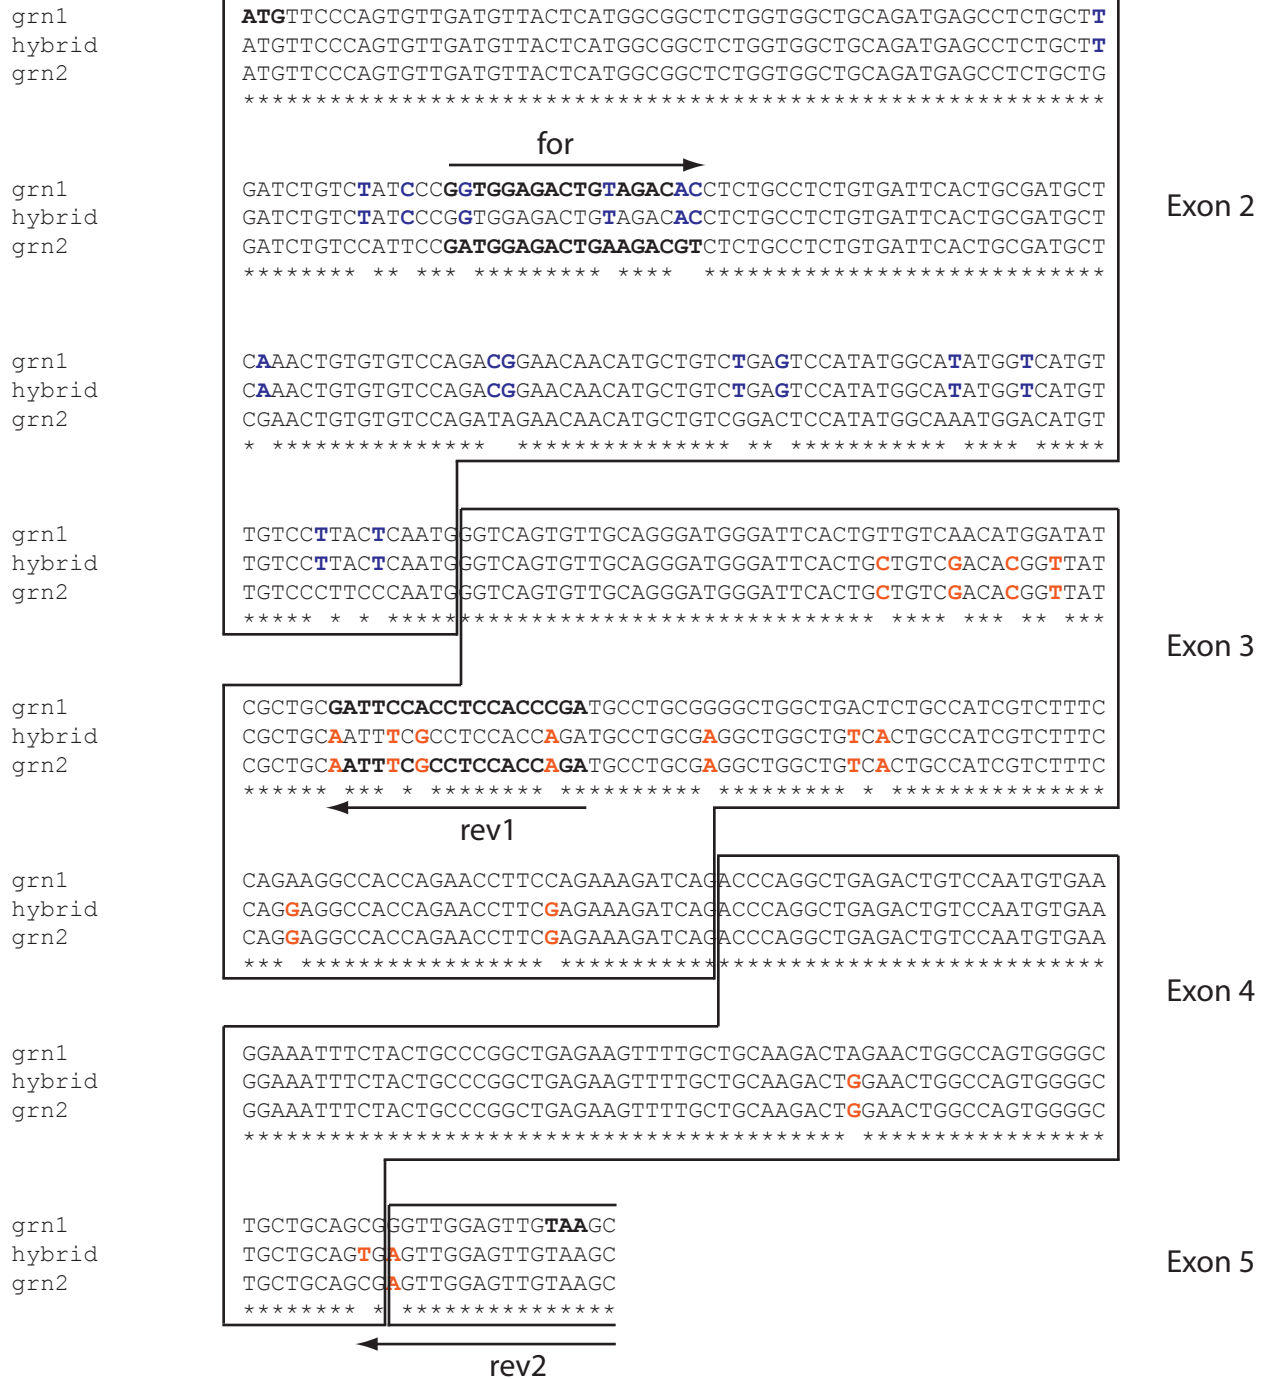

**B**

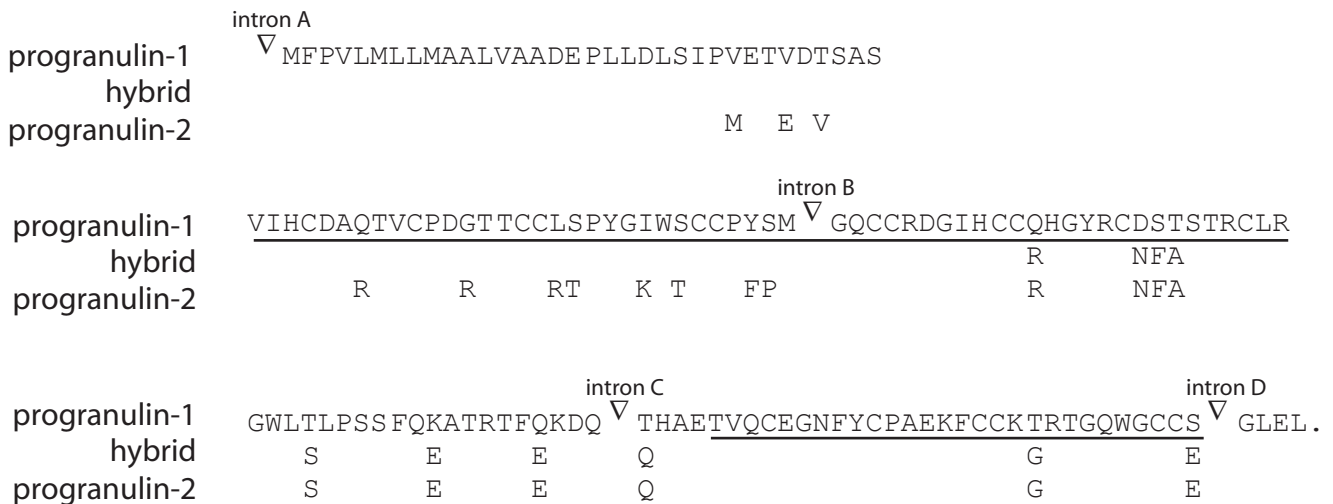

Supplement: 1471-2164-6-156-S5.pdf [file 1471-2164-6-156-S5.pdf]
