# Supplementary material for: The zebrafish progranulin gene family and antisense transcripts
Source: PubMed Central journal article supplement (PMC1310530; doi:10.1186/1471-2164-6-156), 2005-11-08
Supplement: 1471-2164-6-156-S9.pdf [file 1471-2164-6-156-S9.pdf]

### ***Progranulin-1 and Progranulin-2***

map forward  
map reverse1  
map reverse2

5' – ACT GTG TGT CCA GAC GG – 3'  
5' – CCA TCC CTG CAA CAC TG – 3'  
5' – TCT GGT GGA GGC GAA ATT – 3'

### ***Progranulin-a***

map forward  
map reverse

5' – ATG TTG TGC AGT GTG AAG GAC – 3'  
5' – CAT CAG CAG ACA GGA GAA CTC – 3'

### ***Progranulin-b***

map forward  
map reverse

5' – AAC GCA TGC ACT GCT CTG ATC – 3'  
5' – AGT TCC CTG ATA ACA GCA GTG – 3'
