# Supplementary material for: The zebrafish progranulin gene family and antisense transcripts
Source: PubMed Central journal article supplement (PMC1310530; doi:10.1186/1471-2164-6-156), 2005-11-08
Supplement: 1471-2164-6-156-S10.pdf [file 1471-2164-6-156-S10.pdf]

| gene         | primers                                                                                                                       | size (bp)  | annealing T |
|--------------|-------------------------------------------------------------------------------------------------------------------------------|------------|-------------|
| grna         | FOR: 5' - CTCAACTCACTCACATCCGC - 3'<br>REV: 5' - GTTTATAGAGTTAGGGCTCG - 3'                                                    | 301        | 60          |
| grnb         | FOR: 5' - ACAATGGTGCCTGCAGCTTTC - 3'<br>REV: 5' - GCACACGGCATTTCATAGG - 3'                                                    | 381        | 60          |
| grn1+2       | FOR: 5' - ACAGA CAGCAGCAGAAGCATC - 3'<br>REV: 5' - TTCACATTTGGACAGTCTCAGC - 3'                                                | 409        | 60          |
| grn1<br>grn2 | FOR: 5' - GG TGGAGACTGTAGACAC - 3'<br>FOR: 5' - GATGGAGACTGAAGACGT - 3'                                                       | —          |             |
| grn1<br>grn2 | REV1: 5' - TCGGGTGGAGGTGGAATC - 3'<br>REV1: 5' - TCTGGTGGAGGCGAAATT - 3'                                                      | 190        | 61<br>63    |
| grn1<br>grn2 | REV2: 5' - GCTTACAACCTCCAACCCG - 3'<br>REV2: 5 - GCTTACAACCTCCAACCTCA - 3'                                                    | 372        | 61<br>63    |
| ASgrn1-2     | FOR: 5' - TTAAC TTGTCGAGCGTTTCCC - 3'<br>REV: 5' - GCAGACCACTAATACTCTCCT - 3'                                                 | 556        | 60          |
| actin        | FOR: 5' - ATGGATGATGAAATTGCCGC - 3'<br>REV: 5' - TGTCATCTTTCCCTGTTGG - 3'                                                     | 253        | 60          |
| ASgrna       | 1 FOR: 5' - GCACTAAGCAGTAACGATGGTC - 3'<br>2 REV: 5' - ACTGGAGCAACTGGGTCAACTG - 3'<br>3 REV: 5' - GCTGTTGGTAACTCTATCCTCG - 3' | 342<br>478 | 61<br>61    |
