# Supplementary material for: The zebrafish progranulin gene family and antisense transcripts
Source: PubMed Central journal article supplement (PMC1310530; doi:10.1186/1471-2164-6-156), 2005-11-08

**A**

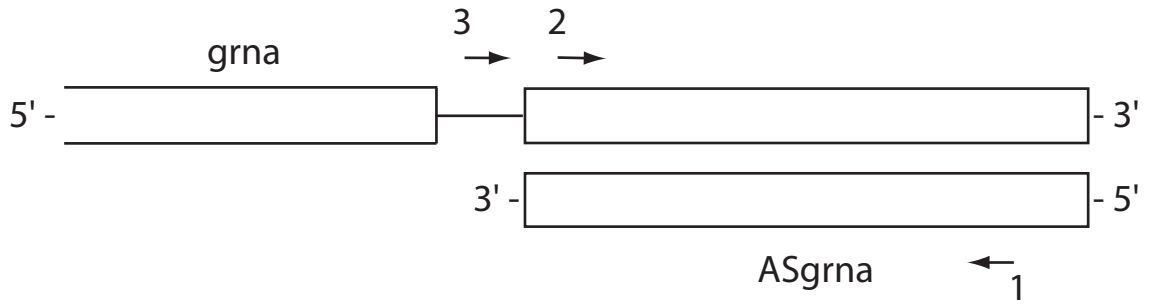

**B**

| cDNA synthesis: | primer 2 + RT |     | primer 2 - RT |     | primer 3 + RT |     | primer 3 - RT |     | genomic DNA |     | H2O only |
|-----------------|---------------|-----|---------------|-----|---------------|-----|---------------|-----|-------------|-----|----------|
|                 | 1/2           | 1/3 | 1/2           | 1/3 | 1/2           | 1/3 | 1/2           | 1/3 | 1/2         | 1/3 | 1/2/3    |

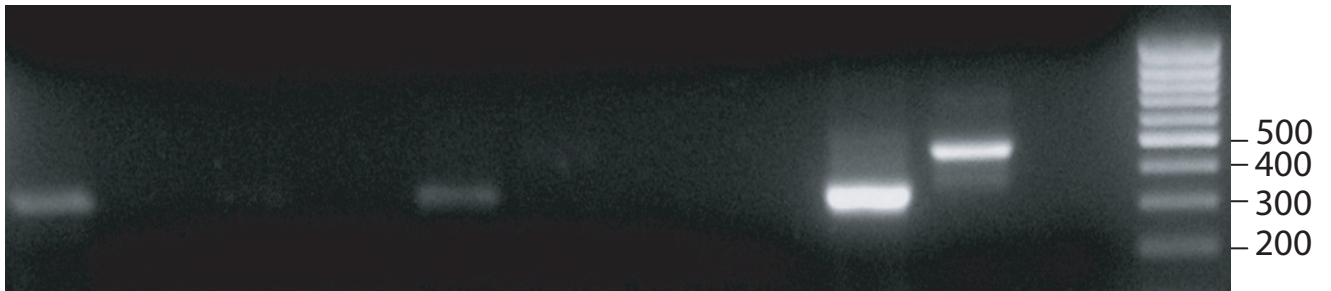

Supplement: 1471-2164-6-156-S11.pdf [file 1471-2164-6-156-S11.pdf]
