# Supplementary material for: The zebrafish progranulin gene family and antisense transcripts
Source: Springer Nature journal article supplement (doi:10.1186/1471-2164-6-156), 2005-11-08
Supplement: 12864_2005_357_MOESM4_ESM.pdf [file 12864_2005_357_MOESM4_ESM.pdf]

**consensus splice site sequences**

| 5' donor | (C/A) <b>AG / gt</b> (a,g)agt..... <b>INTRON</b> ..... (c,t) <b>ag / G</b> | 3' acceptor  |
|----------|----------------------------------------------------------------------------|--------------|
|          | <b><i>grn1</i></b>                                                         | splice phase |
|          | (A)AG / gt (a) aat.....intron A.....(c)ag / A                              | 0            |
|          | (A)TG / gt (a) aca.....intron B.....(c)ag / G                              | 0            |
|          | (C)AG / gt (a) tgg.....intron C.....(t)ag / A                              | 0            |
|          | (G)CG / gt (a) aaa.....intron D.....(t)ag / G                              | 1            |
|          | <b><i>grn2</i></b>                                                         |              |
|          | (A)AG / gt (a) aat.....intron A.....(c)ag / A                              | 0            |
|          | (A)TG / gt (a) aga.....intron B .....(c)ag / G                             | 0            |
|          | (C)AG / gt (a) tgg.....intron C.....(t)ag / A                              | 0            |
|          | (G)CG / gt (a) aaa.....intron D.....(t)ag / A                              | 1            |
|          | <b><i>ASgrn1-2</i></b>                                                     |              |
|          | (G)TG / gt (a) aga.....intron A.....(c)ag / T                              | N/A          |
|          | (T)AG / gt (a) tgt.....intron B.....(c)ag / T                              |              |
|          | (T)AG / gt (a) tgt.....intron C.....(c)ag / T                              |              |
