# Supplementary material for: The zebrafish progranulin gene family and antisense transcripts
Source: Springer Nature journal article supplement (doi:10.1186/1471-2164-6-156), 2005-11-08
Supplement: 12864_2005_357_MOESM7_ESM.pdf [file 12864_2005_357_MOESM7_ESM.pdf]

5'

TACAGTGCATCCGGAAAGTATTCATAGCGCTTCACTTTTCACACATTTTTTATGTTACAGCC  
 TTATTCCAAATGGATTAAATTAAGTTTATTTCTCAACATTCACACACAATACCCATAAT  
 GACCAATGTGAAAAAAGATTTTTTGAAATTGTTGCAAAATTTATTAATAATAAAAAACCTGAAA  
 AATCATATGTGCA TCAGTATTCACAGCCTTTGCCGTGAAGCTCTAAATTGAGCTCAGGTACA  
 TTCTGTTTTCTAAATTGAGCTCAGGTACATCTGTTTCCACTGATCATCTTGAGATGTTTC  
 AGCAGCTTCATTGGAGTTCACCTGTGGTAAATTCAGTTAATTGGACATGATTTGAAAAGGCA  
 TACACCTGTCTATATAAGGTCCCAGGGTTGACAGTGCATGTCAAAGCACAAACCAAGC**ATG**A  
 AGTCAAAGGAATGTC TGTAAACCTCCGAGACAGGAATGTTTAAAGGCA CAAGGCTGGGGAA  
 GGTTACAGAAACAT T-CTGCTGTTCTGAAAGTTCCAATGAGCAC-GTGGCCTCCATGATCTG  
 TA+GTGGAAGATGTTT GGAACCA CAAGGACTCGTCTACAGCTGGCCGGCCATCTAGGCTGA  
 GTGT TTGGGGGAGAAGGTCCTTAGTCAGGGAGGTGATCAATAACCCGATGGTCACTCTGCT  
 GAGCTCAGCGTTCTTC TGTGGAGAGAGGAGAACCTTACAGAAAGGACAACATTGTGCAGCA  
 -----  
 ATCCACCAATCAGGCCAGTATGGCAGAGTAGCCAGACGGAAACCACTCCGCACCTGGAATTT  
 ++GCCTAAAGACATATGAAACACTCTCAAACC+TAGGAAACTAACTCTCTGGTCTGATGAG  
 ACTAATATTGAACTCTTTGAGTGAATGCCAGGCATTACGTTTGGAGAAAACCAAGTCAGCGC  
 TCATCACCAGGCTAATACCATCCCTACTGTTGGCAGCATCATGCTGTGGAGATGTTTTCAG  
 CAGCAGGAAGTGGAAAGACTAGTCAGGATAGAGGGAAAGATGAATGCAGCAATGTACAGAGAC  
 ATCCTGAA TAAAGACCTGCTGCAGAGTCTCTTGACCTCAGACTGGGGCGGACGTTTCATCTT  
 TTAGCAGGACAA TGACCCAAGCACACTGCCAAAATATCAATGGAGTGGCTTCACAAACAAC T  
 CGGTGAATGTCTTTGAGTGCCCGAGACAGAGCCCAGACCTAAATGGTAT TGAACCTCTCTGG  
 -----  
 AGAGATCTGAAAATGCGTGTACA CCGTCAC TTCCCATCCAACCTGATAGAGCTTGAGAGGTA  
 -----  
 CTGCAAAGAGGAATGGGCAAAAA T+++++++TCCCAAAGACAGGTGTGCCAAGCTTGTGGC  
 ATCATATTCAAAAAGACTTGAGGCTGTAAATCGCTGCCAAAGGTGCATCAACAAAGTAT**TGA**G  
 CAAAAGCTGTGAATAC TGATGTACATGTGATTTTTTCAGGTTTTTTATTTGTAATAAATTTGC  
 AACAATTTCAAAAAA TCTTTTTTCACATTGTCATTATGGGGTATTGTGTGTAGAATGTTGA  
GGAAATAAATGA+ATTTA++++ATCC++++ATTTT++++  
 ttc ttttatt tta ttatt tcacctttcttggaaaggacagta  
 ++++++GGAAA+++++AAGGCT+++++  
 gagattgcagaca gtattgggagcagagagagggg g tggcaaaggacttcga  
 ++++++GTGA+++++  
 gccgggaatcgaacttgggtcacc gcaccatggtgctatatgtgcacttaaccactag  
 ++++++CATAAAAATGTGAAAAAGTGAAGCG+++++  
 gctattggcaccgacttggagaatttga-g tcaatc atcaatcaatccatcaatc  
 ++++++CTATGAA TACTTCCGGATGCACTGTA  
 tatctatctatccat ct ctg ctgctgtctgtctgtctgtctgtctgtctgtctg

ASgrn1-2 exon 4 (reverse complement)

3'
