# Supplementary material for: The zebrafish progranulin gene family and antisense transcripts
Source: Springer Nature journal article supplement (doi:10.1186/1471-2164-6-156), 2005-11-08

A

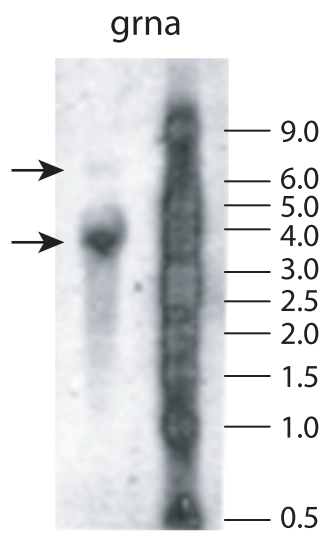

B

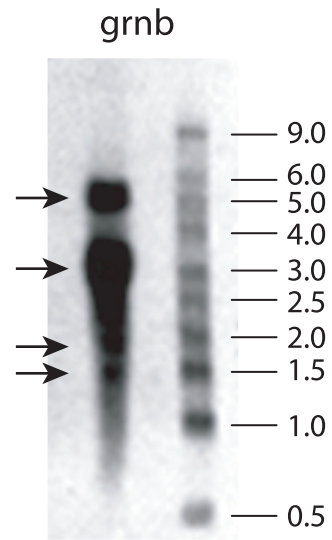

C

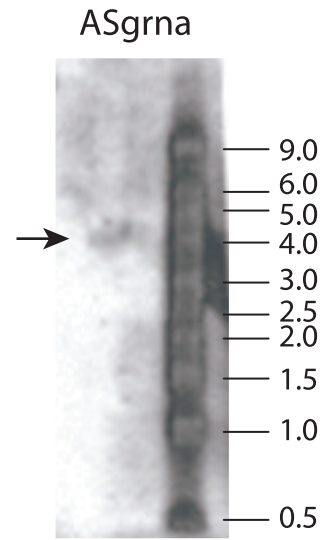

D

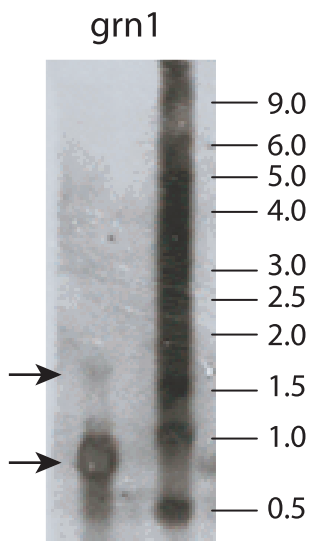

E

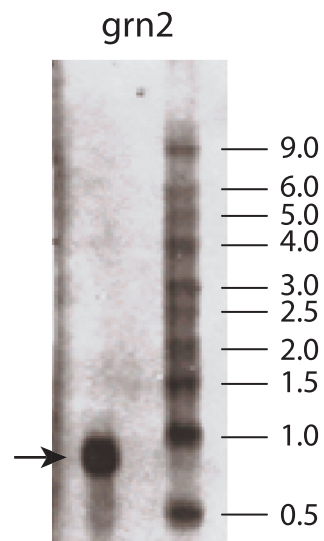

F

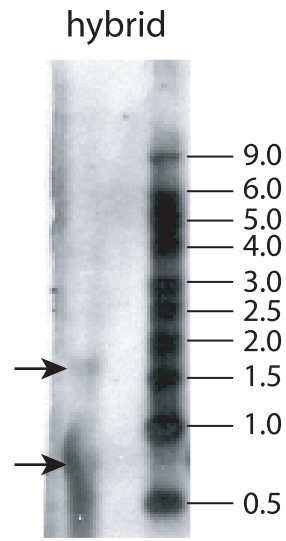

G

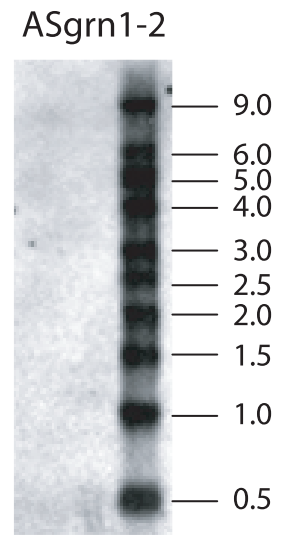

Supplement: 12864_2005_357_MOESM8_ESM.pdf [file 12864_2005_357_MOESM8_ESM.pdf]
